# Supplementary material for: Extracellular Fluid Excess Is Significantly Associated With Coronary Artery Calcification in Patients With Chronic Kidney Disease
Source: PubMed Central journal article supplement (PMC6064889; doi:10.1161/jaha.118.008935), 2018-06-30
Supplement: JAH3-7-e008935-s001.pdf [file JAH3-7-e008935-s001.pdf]

# **SUPPLEMENTAL MATERIAL**

**Table S1. Baseline characteristics according to CKD stages.**

|                                           | <b>Total<br/>(n=1741)</b> | <b>Stage 1<br/>(n=579)</b> | <b>Stage 2<br/>(n=627)</b> | <b>Stage 3<br/>(n=323)</b> | <b>Stage 4<br/>(n=141)</b> | <b>Stage 5<br/>(n=71)</b> | <b>P for<br/>trend**</b> |
|-------------------------------------------|---------------------------|----------------------------|----------------------------|----------------------------|----------------------------|---------------------------|--------------------------|
| <b>Age (years)</b>                        | 60.8 ± 11.4               | 55.9 ± 10.7                | 63.6 ± 0.4                 | 62.3 ± 11.4                | 59.3 ± 12.7                | 57.9 ± 11.7               | <0.001                   |
| <b>Men (%)</b>                            | 953 (54.7)                | 300 (51.8)                 | 359 (57.3)                 | 192 (59.4)                 | 71 (50.4)                  | 31 (43.7)                 | 0.866                    |
| <b>Body mass index (kg/m<sup>2</sup>)</b> | 25.3 ± 3.8                | 25.4 ± 4.2                 | 25.5 ± 3.4                 | 25.3 ± 3.8                 | 24.8 ± 4.1                 | 23.6 ± 3.4                | 0.017                    |
| <b>Waist to hip ratio</b>                 | 0.93 ± 0.07               | 0.92 ± 0.06                | 0.93 ± 0.07                | 0.94 ± 0.07                | 0.93 ± 0.08                | 0.92 ± 0.08               | <0.001                   |
| <b>ECW/TBW</b>                            | 0.386 ± 0.016             | 0.384 ± 0.020              | 0.385 ± 0.014              | 0.388 ± 0.013              | 0.391 ± 0.018              | 0.392 ± 0.018             | <0.001                   |
| <b>ECW/TBW ≥0.390</b>                     | 518 (29.8)                | 107 (27.1)                 | 170 (27.1)                 | 124 (38.4)                 | 77 (54.6)                  | 40 (56.3)                 | <0.001                   |
| <b>ECW/TBW ≥0.400</b>                     | 110 (6.3)                 | 16 (2.8)                   | 26 (4.1)                   | 25 (7.7)                   | 27 (19.1)                  | 16 (22.5)                 | <0.001                   |
| <b>Pulse pressure (mmHg) *</b>            | 48.7 ± 22.9               | 38.6 ± 21.3                | 42.0 ± 22.8                | 44.4 ± 21.8                | 49.7 ± 21.6                | 53.7 ± 18.8               | <0.001                   |
| <b>Diabetes (%)</b>                       | 730 (42.1)                | 214 (37.1)                 | 266 (42.8)                 | 160 (49.5)                 | 63 (44.7)                  | 27 (28.6)                 | 0.019                    |
| <b>Hypertension (%)</b>                   | 1474 (85.0)               | 460 (79.7)                 | 541 (87.0)                 | 288 (89.2)                 | 124 (87.9)                 | 61 (85.9)                 | 0.001                    |
| <b>Cardiovascular disease (%)‡</b>        | 750 (43.3)                | 281 (48.7)                 | 341 (54.8)                 | 95 (29.4)                  | 22 (15.7)                  | 11 (15.9)                 | <0.001                   |
| <b>Smoking (%)</b>                        | 781 (45.0)                | 249 (43.2)                 | 287 (45.8)                 | 163 (50.8)                 | 57 (40.7)                  | 25 (35.2)                 | 0.871                    |
| <b>CACS †</b>                             | 22.0 (0.0 – 189.3)        | 0.0 (0.0 – 80.5)           | 43.7 (0.0 – 256.5)         | 45.2 (0.0 – 267.0)         | 42.1 (0.0 – 255.7)         | 20.1 (0.0 – 132.0)        | <0.001                   |
| <b>CAC (%)§</b>                           | 251 (14.4)                | 41 (7.1)                   | 104 (16.6)                 | 68 (21.1)                  | 24 (17.0)                  | 14 (19.7)                 | <0.001                   |
| <b>Laboratory findings</b>                |                           |                            |                            |                            |                            |                           |                          |
| eGFR (mL•min-1•1.73 m <sup>-2</sup> )     | 72.2 ± 28.6               | 100.6 ± 7.9                | 77.4 ± 8.7                 | 46.5 ± 8.8                 | 22.7 ± 4.3                 | 10.8 ± 2.7                | <0.001                   |
| Hemoglobin (g/dL)                         | 13.5 ± 2.0                | 14.3 ± 1.5                 | 14.0 ± 1.7                 | 13.2 ± 2.0                 | 11.3 ± 1.3                 | 10.4 ± 1.4                | <0.001                   |
| Total cholesterol (mg/dL)                 | 174.1 ± 38.2              | 176.5 ± 38.8               | 172.3 ± 34.0               | 173.7 ± 41.7               | 177.8 ± 43.6               | 166.5 ± 38.8              | 0.070                    |
| LDL (mg/dL)                               | 96.2 ± 30.9               | 98.2 ± 32.2                | 94.8 ± 29.3                | 94.3 ± 29.8                | 100.5 ± 34.8               | 90.4 ± 19.2               | 0.165                    |
| HDL (mg/dL)                               | 49.5 ± 13.5               | 51.5 ± 13.5                | 50.8 ± 12.6                | 48.1 ± 14.5                | 45.5 ± 12.7                | 41.5 ± 12.7               | <0.001                   |
| Triglyceride (mg/dL)                      | 139.2 ± 79.9              | 134.7 ± 79.4               | 136.9 ± 76.7               | 148.5 ± 92.0               | 144.7 ± 63.3               | 146.2 ± 80.5              | <0.001                   |
| Albumin (g/dL)                            | 4.2 ± 0.3                 | 4.3 ± 0.3                  | 4.3 ± 0.3                  | 4.2 ± 0.4                  | 4.0 ± 0.4                  | 3.9 ± 0.4                 | <0.001                   |
| Calcium (mg/dL)                           | 9.15 ± 0.46               | 9.17 ± 0.38                | 9.22 ± 0.42                | 9.16 ± 0.46                | 8.95 ± 0.54                | 8.65 ± 0.68               | <0.001                   |
| Phosphate (mg/dL)                         | 3.63 ± 0.55               | 3.61 ± 0.48                | 3.52 ± 0.50                | 3.60 ± 0.52                | 3.86 ± 0.51                | 4.38 ± 0.93               | <0.001                   |
| Sodium (mmol/L)                           | 141.4 ± 2.2               | 141.2 ± 2.2                | 141.5 ± 2.2                | 141.6 ± 2.4                | 141.5 ± 2.4                | 140.9 ± 3.1               | 0.028                    |
| Potassium (mmol/L)                        | 4.6 ± 0.5                 | 4.4 ± 0.4                  | 4.5 ± 0.4                  | 4.7 ± 0.5                  | 5.0 ± 0.5                  | 4.9 ± 0.5                 | <0.001                   |
| Chloride (mmol/L)                         | 105.3 ± 4.8               | 102.7 ± 2.7                | 103.1 ± 2.5                | 104.3 ± 3.4                | 106.5 ± 3.3                | 105.3 ± 4.8               | <0.001                   |

|                                      |                  |                 |                 |                   |                     |                     |        |
|--------------------------------------|------------------|-----------------|-----------------|-------------------|---------------------|---------------------|--------|
| hs-CRP (mg/L) <sup>†</sup>           | 0.8 (0.5 – 1.5)  | 0.8 (0.5 – 1.5) | 0.8 (0.5 – 1.4) | 0.9 (0.6 – 1.7)   | 0.8 (0.5 – 2.3)     | 0.8 (0.5 – 1.8)     | 0.016  |
| uACR (mg/gCr) <sup>†</sup>           | 4.8 (1.1 – 37.9) | 1.5 (0.7 – 7.2) | 2.6 (0.9 – 9.5) | 14.2 (3.1 – 57.8) | 64.8 (26.5 – 154.0) | 82.2 (36.8 – 186.2) | <0.001 |
| <b>Medications</b>                   |                  |                 |                 |                   |                     |                     |        |
| Antihypertensive drugs <sup>  </sup> | 1335 (76.7)      | 407 (70.3)      | 483 (77.0)      | 261 (80.8)        | 122 (86.5)          | 62 (87.3)           | <0.001 |
| Lipid lowering agents <sup>#</sup>   | 955 (54.9)       | 319 (55.1)      | 384 (61.2)      | 156 (48.3)        | 65 (46.1)           | 31 (43.7)           | 0.002  |
| Diuretics                            | 429 (24.6)       | 109 (18.8)      | 173 (27.6)      | 80 (24.8)         | 42 (29.8)           | 25 (35.2)           | <0.001 |
| Antithrombotic agents <sup>**</sup>  | 667 (38.3)       | 199 (34.4)      | 284 (45.3)      | 114 (35.3)        | 47 (33.3)           | 23 (32.4)           | 0.540  |
| Oral calcium                         | 22 (1.3)         | 0 (0.0)         | 5 (0.8)         | 6 (1.9)           | 3 (2.1)             | 8 (11.3)            | <0.001 |
| Calcium-based phosphate binder       | 6 (0.3)          | 0 (0.0)         | 0 (0.0)         | 1 (0.3)           | 2 (1.4)             | 3 (4.2)             | <0.001 |
| Non-Ca-based phosphate binder        | 1 (0.1)          | 0 (0.0)         | 0 (0.0)         | 1 (0.3)           | 0 (0.0)             | 0 (0.0)             | 0.429  |
| Phosphate binders <sup>†</sup>       | 7 (0.4)          | 0 (0.0)         | 0 (0.0)         | 2 (0.6)           | 2 (1.4)             | 3 (4.2)             | <0.001 |

\*Mean value of pulse pressure measured by 24-hour ambulatory blood pressure monitoring, <sup>†</sup>Kruskal-Wallis test, <sup>\*</sup>Cardiovascular diseases included coronary occlusive disease, ischemic heart disease, congestive heart failure, arrhythmia, atherosclerosis, and cerebrovascular disease., <sup>§</sup>A total CACS  $\geq$  400 was defined as CAC., <sup>||</sup> Antihypertensive drugs included angiotensin receptor blockers, angiotensin-converting enzyme inhibitors, calcium channel blocker,  $\beta$ -blocker, and  $\alpha$ -blocker., <sup>#</sup> Lipid lowering agents included statin, fibrate, and nicotinic acid., <sup>\*\*</sup>Antithrombotic agents included aspirin, other anti-platelets and anti-coagulants., <sup>†</sup> Phosphate binders included both calcium-based and non-calcium-based phosphate binders, and <sup>\*\*†</sup>P values by the Mantel–Haenszel’s linear by linear association method or Jonckheere–Terpstra test

ECF/TBW, extracellular water to total body water ratio; CKD, chronic kidney disease; CACS, coronary artery calcium score; CAC, coronary artery calcification; eGFR, estimated glomerular filtration rate; LDL, low density lipoprotein cholesterol; HDL, high density lipoprotein cholesterol; hs-CRP, high-sensitivity C-reactive protein; uACR, urine albumin to creatinine ratio

**Table S2. Univariate linear regression analysis of variables associated with extracellular fluid status.**

|                                                          | $\beta$ | 95% CI          | <i>P</i> |
|----------------------------------------------------------|---------|-----------------|----------|
| <b>Age (per 1 year)</b>                                  | 0.029   | 0.023 – 0.036   | <0.001   |
| <b>Men (vs. Women)</b>                                   | -0.509  | -0.660 – -0.359 | <0.001   |
| <b>Body mass index (per 1 kg/m<sup>2</sup>)</b>          | -0.043  | -0.063 – -0.023 | <0.001   |
| <b>Waist to hip ratio (per 0.01)</b>                     | 0.012   | 0.001 – 0.023   | 0.037    |
| <b>Pulse pressure (per 1 mmHg)<sup>†</sup></b>           | 0.005   | 0.002 – 0.008   | 0.004    |
| <b>Hypertension</b>                                      | -0.026  | -0.238 – 0.189  | 0.815    |
| <b>Diabetes</b>                                          | 0.431   | 0.277 – 0.583   | <0.001   |
| <b>Cardiovascular diseases<sup>‡</sup></b>               | -0.046  | -0.197 – 0.108  | 0.556    |
| <b>Smoking history</b>                                   | -0.484  | -0.635 – -0.332 | <0.001   |
| <b>CACS (per 1 log)<sup>*</sup></b>                      | 0.352   | 0.250 – 0.453   | <0.001   |
| <b>Laboratory findings</b>                               |         |                 |          |
| eGFR (per 1 mL•min <sup>-1</sup> •1.73 m <sup>-2</sup> ) | -0.009  | -0.012 – -0.006 | <0.001   |
| Hemoglobin (per 1 g/dL)                                  | -0.254  | -0.293 – -0.215 | <0.001   |
| Total cholesterol (per 1 mg/dL)                          | -0.002  | -0.004 – 0.000  | 0.024    |
| LDL (per 1 mg/dL)                                        | -0.002  | -0.004 – 0.001  | 0.157    |
| HDL (per 1 mg/dL)                                        | 0.003   | -0.003 – 0.009  | 0.355    |
| Triglyceride (per 1 mg/dL)                               | -0.002  | -0.003 – -0.001 | <0.001   |
| Albumin (per 1 g/dL)                                     | -1.073  | -1.292 – -0.853 | <0.001   |
| Calcium (per 1 mg/dL)                                    | -0.475  | -0.641 – -0.309 | <0.001   |
| Phosphate (per 1 mg/dL)                                  | 0.238   | 0.102 – 0.379   | 0.001    |
| Sodium                                                   | 0.032   | -0.005 – 0.069  | 0.091    |
| Potassium                                                | 0.177   | -0.002 – 0.358  | 0.054    |
| Chloride                                                 | 0.064   | 0.037 – 0.091   | <0.001   |
| hs-CRP (per 1 log) <sup>*</sup>                          | 0.224   | -0.493 – 0.960  | 0.544    |
| uACR (per 1 log) <sup>*</sup>                            | 0.232   | 0.021 – 0.441   | 0.031    |
| <b>Medications</b>                                       |         |                 |          |
| Antihypertensive drugs <sup>§</sup>                      | -0.132  | -0.311 – 0.049  | 0.150    |
| Lipid lowering agents <sup>  </sup>                      | -0.016  | -0.168 – 0.138  | 0.834    |
| Diuretics                                                | -0.161  | -0.016 – 0.336  | 0.073    |
| Antithrombotic agents <sup>#</sup>                       | 0.028   | -0.126 – 0.186  | 0.723    |
| Oral calcium                                             | 0.280   | -0.401 – 0.960  | 0.420    |
| Phosphate binders <sup>**</sup>                          | 0.656   | -0.545 – 1.857  | 0.284    |

\* Log transformed, <sup>†</sup> Mean value of pulse pressure measured by 24-hour ambulatory blood pressure monitoring, <sup>‡</sup> Cardiovascular diseases included coronary occlusive disease, ischemic heart disease, congestive heart failure, arrhythmia, atherosclerosis, and cerebrovascular disease., <sup>§</sup> Antihypertensive drugs included angiotensin receptor blockers, angiotensin-converting enzyme inhibitors, calcium channel blocker,  $\beta$ -blocker, and  $\alpha$ -blocker., <sup>||</sup> Lipid lowering agents included statin, fibrate, and nicotinic acid., <sup>#</sup> Antithrombotic agents included aspirin, other anti-platelets and anti-coagulants., <sup>\*\*</sup> Phosphate binders included both calcium-based and non-calcium-based phosphate binders.

CI, confidence interval; CACS, coronary artery calcium score; eGFR, estimated glomerular filtration rate; LDL, low density lipoprotein cholesterol; HDL, high density lipoprotein cholesterol; hs-CRP, high-sensitivity C-reactive protein; uACR, urine albumin to creatinine ratio

**Table S3. Univariable logistic regression analyses for presence of coronary artery calcification\*.**

|                                                          | Univariable |                |        |
|----------------------------------------------------------|-------------|----------------|--------|
|                                                          | OR          | 95% CI         | P      |
| <b>Age (per 1 year)</b>                                  | 1.055       | 1.040 – 1.070  | <0.001 |
| <b>Men (vs. Women)</b>                                   | 1.944       | 1.463 – 2.583  | <0.001 |
| <b>Body mass index (per 1 kg/m<sup>2</sup>)</b>          | 1.000       | 0.965 – 1.035  | 0.989  |
| <b>Waist hip ratio (per 0.01)</b>                        | 1.054       | 1.033 – 1.075  | <0.001 |
| <b>Pulse pressure (per 1 mmHg) ‡</b>                     | 1.007       | 1.000 – 1.013  | 0.035  |
| <b>Hypertension</b>                                      | 1.287       | 0.861 – 1.923  | 0.218  |
| <b>Diabetes</b>                                          | 2.459       | 1.867 – 3.238  | <0.001 |
| <b>Cardiovascular diseases §</b>                         | 1.315       | 1.005 – 1.720  | 0.046  |
| <b>Smoking history</b>                                   | 1.703       | 1.299 – 2.231  | <0.001 |
| <b>ECW/TBW (per 0.01)</b>                                | 1.297       | 1.147 – 1.467  | <0.001 |
| <b>Laboratory findings</b>                               |             |                |        |
| eGFR (per 1 mL•min <sup>-1</sup> •1.73 m <sup>-2</sup> ) | 0.988       | 0.983 – 0.992  | <0.001 |
| Hemoglobin (per 1 g/dL)                                  | 0.879       | 0.820 – 0.942  | <0.001 |
| Total cholesterol (per 1 mg/dL)                          | 0.991       | 0.987 – 0.995  | <0.001 |
| LDL (per 1 mg/dL)                                        | 0.988       | 0.983 – 0.993  | <0.001 |
| HDL (per 1 mg/dL)                                        | 0.987       | 0.977 – 0.998  | 0.021  |
| Triglyceride (per 1 mg/dL)                               | 0.999       | 0.997 – 1.001  | 0.411  |
| Albumin (per 1 g/dL)                                     | 0.538       | 0.371 – 0.779  | 0.001  |
| Calcium (per 1 mg/dL)                                    | 1.184       | 0.884 – 1.586  | 0.258  |
| Phosphate (per 1 mg/dL)                                  | 0.923       | 0.722 – 1.181  | 0.524  |
| hs-CRP (per 1 log) †                                     | 0.835       | 0.255 – 3.097  | 0.788  |
| uACR (per 1 log) †                                       | 1.273       | 0.921 – 1.760  | 0.144  |
| <b>Medications</b>                                       |             |                |        |
| Antihypertensive drugs ‖                                 | 1.232       | 0.886 – 1.712  | 0.215  |
| Lipid lowering agents #                                  | 1.346       | 1.025 – 1.769  | 0.033  |
| Diuretics                                                | 1.300       | 0.966 – 1.750  | 0.083  |
| Antithrombotic agents **                                 | 1.813       | 1.386 – 2.371  | <0.001 |
| Oral calcium                                             | 1.324       | 0.444 – 3.946  | 0.614  |
| Phosphate binders ††                                     | 4.494       | 1.000 – 20.200 | 0.050  |

\*A total Agatston coronary artery calcium score  $\geq 400$  was defined as coronary artery calcification., †log transformed, ‡ Mean value of pulse pressure measured by 24-hour ambulatory blood pressure, § Cardiovascular diseases included coronary occlusive disease, ischemic heart disease, congestive heart failure, arrhythmia, atherosclerosis, and cerebrovascular disease., ‖ Antihypertensive drugs included angiotensin receptor blockers, angiotensin-converting enzyme inhibitors, calcium channel blocker,  $\beta$ -blocker, and  $\alpha$ -blocker., # Lipid lowering agents included statin, fibrate, and nicotinic acid., \*\* Antithrombotic agents included aspirin, other anti-platelets and anti-coagulants., †† Phosphate binders included both calcium-based and non-calcium-based phosphate binders.

OR, odds ratio; CI, confidence interval; ECW/TBW, extracellular water to total body water ratio; eGFR, estimated glomerular filtration rate; Hb, hemoglobin; LDL, Low density lipoprotein cholesterol; HDL, high density lipoprotein cholesterol; hs-CRP, high-sensitivity C-reactive protein; uACR, urine albumin to creatinine ratio

**Table S4. Reclassification improvement for presence of coronary artery calcification \* by extracellular fluid status.**

|                                         |          | Basic clinical model <sup>†</sup> + ECW/TBW |          |      | Reclassification |      |
|-----------------------------------------|----------|---------------------------------------------|----------|------|------------------|------|
|                                         |          | <10%                                        | 10 – 20% | ≥20% | Up               | Down |
| <b>Non-CAC (CAC &lt;400, n =1490)</b>   |          |                                             |          |      |                  |      |
| <b>Basic clinical model<sup>†</sup></b> | <10%     | 751                                         | 11       | 3    |                  |      |
|                                         | 10 – 20% | 40                                          | 373      | 9    | 23               | 64   |
|                                         | ≥20%     | 0                                           | 24       | 279  |                  |      |
| <b>CAC (CACS ≥400, n =251)</b>          |          |                                             |          |      |                  |      |
| <b>Basic clinical model<sup>†</sup></b> | <10%     | 36                                          | 2        | 0    |                  |      |
|                                         | 10 – 20% | 4                                           | 63       | 10   | 12               | 6    |
|                                         | ≥20%     | 0                                           | 2        | 134  |                  |      |

\* A total Agatston coronary artery calcium score ≥ 400 was defined as coronary artery calcification

† Adjusted for age, sex, waist to hip ratio, hypertension, diabetes, cardiovascular disease, smoking status, pulse pressure, estimated glomerular filtration rate, hemoglobin, low-density lipoprotein cholesterol, albumin, calcium, phosphate, and use of lipid lowering agents, antithrombotic agents, and phosphate binders

ECW/TBW, extracellular water to total body water ratio; NRI, net reclassification improvement; IDI, integrated discrimination improvement

**Table S5. Unadjusted and adjusted linear regression analyses of extracellular fluid status for the coronary artery calcium scores\*.**

|                                    | $\beta$ | 95% CI        | <i>P</i> |
|------------------------------------|---------|---------------|----------|
| <b>ECW/TBW (per 0.01 increase)</b> | 0.074   | 0.052 – 0.095 | <0.001   |
| <b>Model 1<sup>†</sup></b>         | 0.053   | 0.032 – 0.073 | <0.001   |
| <b>Model 2<sup>‡</sup></b>         | 0.038   | 0.017 – 0.060 | <0.001   |
| <b>Model 3<sup>§</sup></b>         | 0.040   | 0.019 – 0.061 | <0.001   |

\* Log transformed coronary artery calcium scores

<sup>†</sup> Adjusted for age, sex, waist to hip ratio, hypertension, diabetes, cardiovascular disease, smoking status, and pulse pressure

<sup>‡</sup> Adjusted for model 1 + estimated glomerular filtration rate, hemoglobin, low-density lipoprotein cholesterol, albumin, calcium, and phosphate

<sup>§</sup> Adjusted for model 2 + use of lipid lowering agents, antithrombotic agents, and phosphate binders

ECW/TBW, extracellular water to total body water ratio; OR, odds ratio; CI, confidence interval

**Table S6. Association of ECF status for the presence of coronary artery calcification\* after additional adjustment of NT-proBNP.**

|                                    | <b>OR</b> | <b>95% CI</b> | <b>P</b> |
|------------------------------------|-----------|---------------|----------|
| <b>ECW/TBW (per 0.01 increase)</b> | 1.941     | 1.474 – 2.554 | <0.001   |
| <b>Model 1<sup>†</sup></b>         | 1.530     | 1.099 – 2.129 | 0.012    |
| <b>Model 2<sup>‡</sup></b>         | 1.645     | 1.113 – 2.432 | 0.013    |
| <b>Model 3<sup>§</sup></b>         | 1.690     | 1.139 – 2.507 | 0.009    |

\* A total Agatston coronary artery calcium score  $\geq 400$  was defined as coronary artery calcification

<sup>†</sup> Adjusted for age, sex, waist to hip ratio, hypertension, diabetes, cardiovascular disease, smoking status, and pulse pressure

<sup>‡</sup> Adjusted for model 1 + estimated glomerular filtration rate, hemoglobin, low-density lipoprotein cholesterol, albumin, calcium, phosphate, and log transformed NT-proBNP

<sup>§</sup> Adjusted for model 2 + use of lipid lowering agents, antithrombotic agents, and phosphate binders

ECW/TBW, extracellular water to total body water ratio; OR, odds ratio; CI, confidence interval



**Table S7. Subgroup analysis.**

|                            | Hypertension group<br>(CAC/total N=65/767) |               |       | DM with albuminuria group<br>(CAC/total N=152/730) |               |        | CVD group*<br>(CAC/total N=8/95) |                |       |
|----------------------------|--------------------------------------------|---------------|-------|----------------------------------------------------|---------------|--------|----------------------------------|----------------|-------|
|                            | OR                                         | 95% CI        | P     | OR                                                 | 95% CI        | P      | OR                               | 95% CI         | P     |
| <b>ECW/TBW (per 0.01)</b>  | 1.589                                      | 1.212 – 2.083 | 0.001 | 1.794                                              | 1.476 – 2.181 | <0.001 | 0.795                            | 0.273 – 2.313  | 0.673 |
| <b>Model 1<sup>†</sup></b> | 1.355                                      | 0.967 – 1.900 | 0.078 | 1.821                                              | 1.469 – 2.256 | <0.001 | 1.284                            | 0.322 – 5.123  | 0.724 |
| <b>Model 2<sup>‡</sup></b> | 1.875                                      | 1.183 – 2.971 | 0.007 | 1.869                                              | 1.411 – 2.476 | <0.001 | 2.183                            | 0.398 – 11.981 | 0.369 |
| <b>Model 3<sup>§</sup></b> | 2.036                                      | 1.271 – 3.261 | 0.003 | 1.867                                              | 1.409 – 2.473 | <0.001 | 2.843                            | 0.383 – 21.115 | 0.307 |

\* CVD group include asymptomatic peripheral vascular disease, atrial fibrillation, and heart failure patients without diabetes.

<sup>†</sup> Adjusted for age, sex, waist to hip ratio, hypertension, diabetes, cardiovascular disease, smoking status, and pulse pressure

<sup>‡</sup> Adjusted for model 1 + hemoglobin, lipid profiles, albumin, and estimated glomerular filtration rate

<sup>§</sup> Adjusted for model 2 + use of lipid lowering agents and antithrombotic agents

DM, diabetes mellitus; CVD, cardiovascular disease; ECW/TBW, extracellular water to total body water ratio; OR, odds ratio; CI, confidence interval

**Table S8. Unadjusted and adjusted odds ratios of extracellular fluid status for the presence of coronary artery calcification\* stratified by the severity of chronic kidney disease.**

|                                    | CKD stage 12 (n = 145/1206) |               |       | CKD stage 3-5 (n = 106/535) |               |        |
|------------------------------------|-----------------------------|---------------|-------|-----------------------------|---------------|--------|
|                                    | OR                          | 95% CI        | P     | OR                          | 95% CI        | P      |
| <b>ECW/TBW (per 0.01 increase)</b> | 1.094                       | 1.014 – 1.182 | 0.021 | 1.820                       | 1.475 – 2.246 | <0.001 |
| <b>Model 1<sup>†</sup></b>         | 1.098                       | 1.014 – 1.188 | 0.021 | 1.722                       | 1.402 – 2.240 | <0.001 |
| <b>Model 2<sup>‡</sup></b>         | 1.109                       | 1.021 – 1.205 | 0.014 | 2.166                       | 1.580 – 2.970 | <0.001 |
| <b>Model 3<sup>§</sup></b>         | 1.113                       | 1.024 – 1.209 | 0.011 | 2.238                       | 1.627 – 3.078 | <0.001 |

\* A total Agatston coronary artery calcium score  $\geq 400$  was defined as coronary artery calcification

<sup>†</sup> Adjusted for age, sex, waist to hip ratio, hypertension, diabetes, cardiovascular disease, smoking status, and pulse pressure

<sup>‡</sup> Adjusted for model 1 + estimated glomerular filtration rate, hemoglobin, low-density lipoprotein cholesterol, albumin, calcium, and phosphate

<sup>§</sup> Adjusted for model 2 + use of lipid lowering agents, antithrombotic agents, and phosphate binders

ECW/TBW, extracellular water to total body water ratio; OR, odds ratio; CI, confidence interval

**Table S9. Association of ECF status for the presence of coronary artery calcification\* depending on diuretic use.**

|                                    | Diuretics non-user |               |       | Diuretics user |               |        |
|------------------------------------|--------------------|---------------|-------|----------------|---------------|--------|
|                                    | OR                 | 95% CI        | P     | OR             | 95% CI        | P      |
| <b>ECW/TBW (per 0.01 increase)</b> | 1.171              | 1.053 – 1.304 | 0.004 | 1.643          | 1.321 – 2.043 | <0.001 |
| <b>Model 1<sup>†</sup></b>         | 1.143              | 1.054 – 1.239 | 0.001 | 1.474          | 1.156 – 1.878 | 0.002  |
| <b>Model 2<sup>‡</sup></b>         | 1.135              | 1.051 – 1.225 | 0.001 | 2.024          | 1.365 – 3.002 | <0.001 |
| <b>Model 3<sup>§</sup></b>         | 1.137              | 1.054 – 1.228 | 0.001 | 2.232          | 1.478 – 3.371 | <0.001 |

\* A total Agatston coronary artery calcium score  $\geq 400$  was defined as coronary artery calcification

<sup>†</sup> Adjusted for age, sex, waist to hip ratio, hypertension, diabetes, cardiovascular disease, smoking status, and pulse pressure

<sup>‡</sup> Adjusted for model 1 + estimated glomerular filtration rate, hemoglobin, low-density lipoprotein cholesterol, albumin, calcium, and phosphate

<sup>§</sup> Adjusted for model 2 + use of lipid lowering agents, antithrombotic agents, and phosphate binders

ECW/TBW, extracellular water to total body water ratio; OR, odds ratio; CI, confidence interval
